# Supplementary material for: The Ankyrin Repeat Domain Controls Presynaptic Localization of Drosophila Ankyrin2 and Is Essential for Synaptic Stability
Source: PubMed Central journal article supplement (PMC6703079; doi:10.3389/fcell.2019.00148), 2019-08-14
Supplement: Data_Sheet_3.pdf [file Data_Sheet_3.pdf]

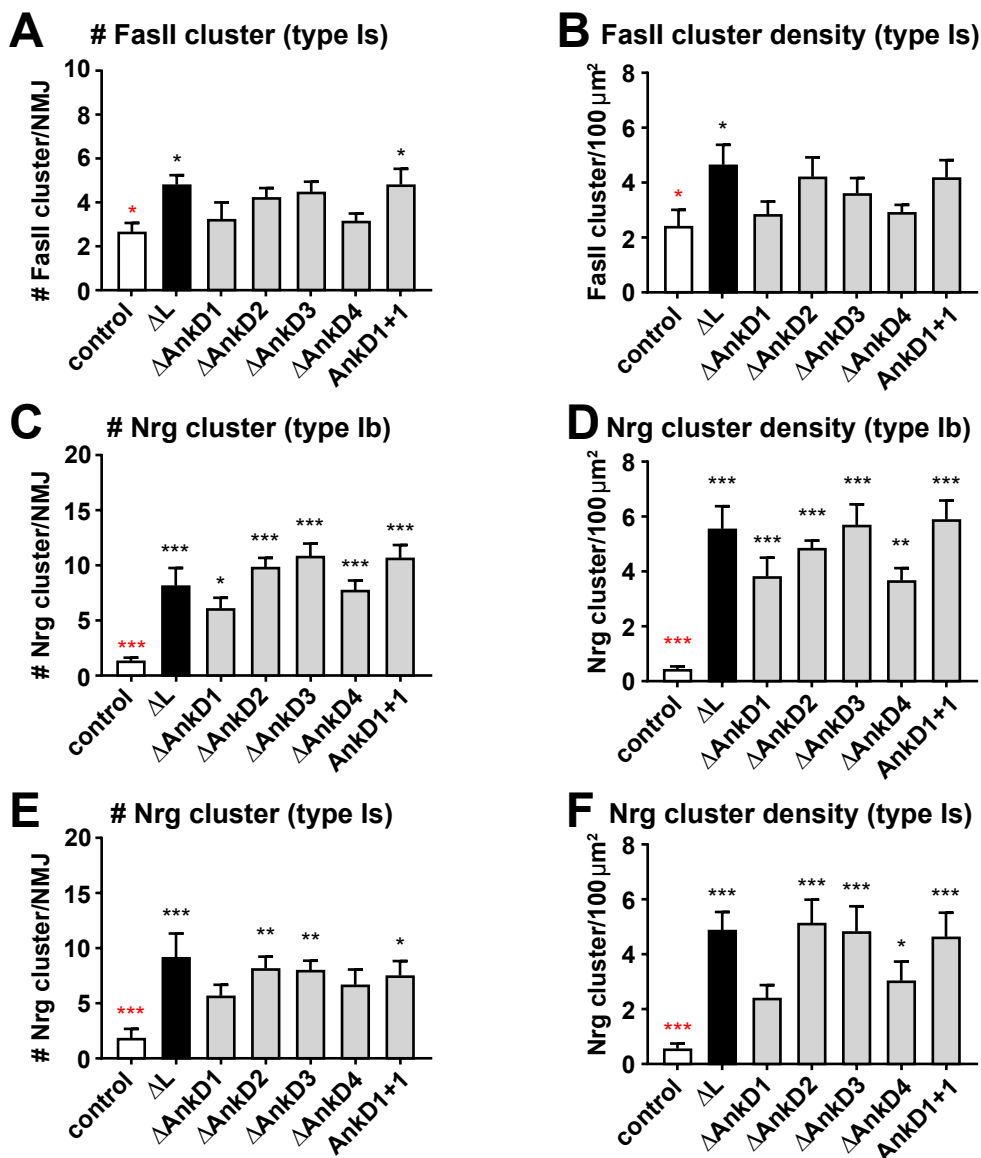

**Figure S3: Analysis of FasII and Nrg organization at type Is/Ib muscle 4 NMJs.**

(A-B) Quantification of FasII cluster number (A) and density (B) at type Is NMJs (n = 12 muscle 4 NMJs, 3 animals).

(C-D) Quantification of Nrg cluster number (C) and density (D) at type Ib NMJs (n = 12 muscle 4 NMJs, 3 animals).

(E-F) Quantification of Nrg cluster number (E) and density (F) at type Is NMJs (n = 12 muscle 4 NMJs, 3 animals). Error bars indicate SEM; \*p < 0.05, \*\*p < 0.01, \*\*\*p < 0.001 (ANOVA); black asterisks represent comparison to controls; red asterisks represent comparison to *ank2<sup>ΔL</sup>*.
